# Supplementary material for: Facile Fabrication of TiO2 Quantum Dots-Anchored g-C3N4 Nanosheets as 0D/2D Heterojunction Nanocomposite for Accelerating Solar-Driven Photocatalysis
Source: MDPI journal article supplement (doi:10.3390/nano13091565), 2023-05-06
Supplement: s1 [file s1]

# Supporting Information

for

## **Facile Fabrication of TiO<sub>2</sub> Quantum Dots-Anchored g-C<sub>3</sub>N<sub>4</sub> Nanosheets as 0D/2D Heterojunction Nanocomposite for Accelerating Solar-Driven Photocatalysis**

**Jin-Hyoek Lee <sup>1,†</sup>, Sang-Yun Jeong <sup>1,†</sup>, Young-Don Son <sup>2</sup> and Sang-Wha Lee <sup>1,\*</sup>**

<sup>1</sup> Chemical and Biological Engineering Department, Gachon University, , Seongnam-si 13120, Republic of Korea; 71in.cmsal@gmail.com (J.-H.L.); wjdtkddb762@naver.com (S.-Y.J.)

<sup>2</sup> Department of Biomedical Engineering, College of IT Convergence, Gachon University, Seongnam-si 13120, Republic of Korea; ydson@gachon.ac.kr

\* Correspondence: lswha@gachon.ac.kr; Tel.: +82-10-2635-5360

† These authors contributed equally to this work.

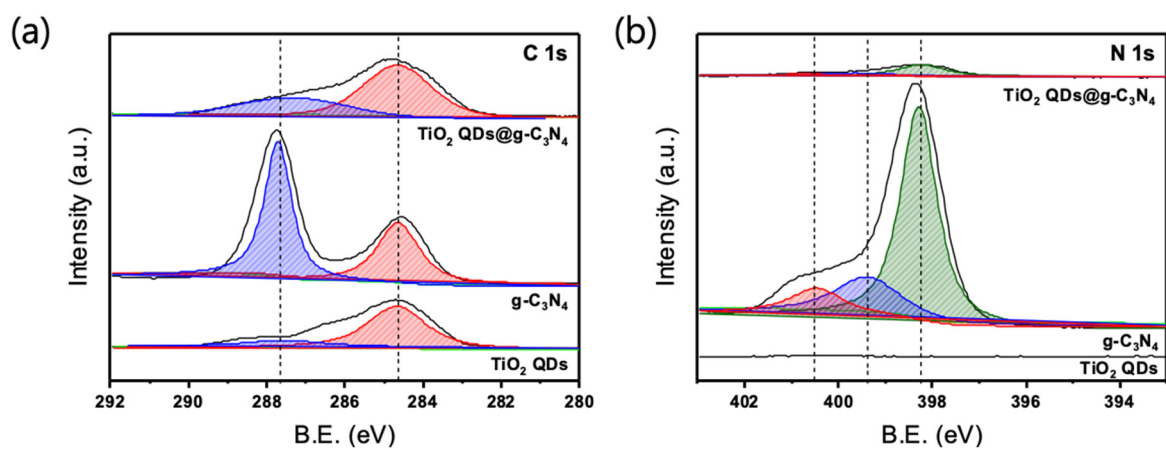

**Figure S1.** Core-level spectra of  $\text{TiO}_2$  QDs,  $\text{g-C}_3\text{N}_4$  and  $\text{TiO}_2$  QDs@g- $\text{C}_3\text{N}_4$  by XPS (a) C 1s, (b) N 1s.

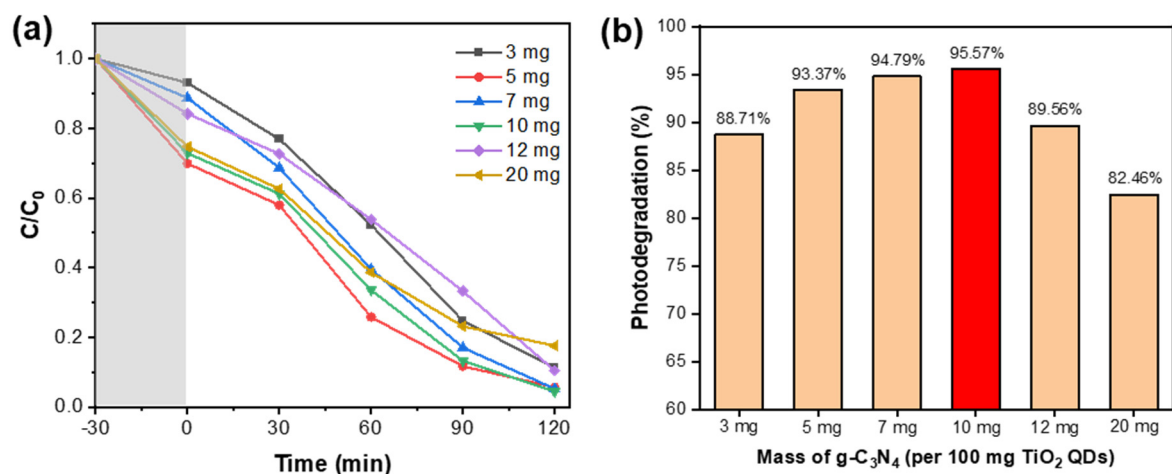

**Figure S2.** Photodegradation rate of MO dye over the TiO<sub>2</sub> QDs@g-C<sub>3</sub>N<sub>4</sub> with different g-C<sub>3</sub>N<sub>4</sub> contents under simulated solar light.

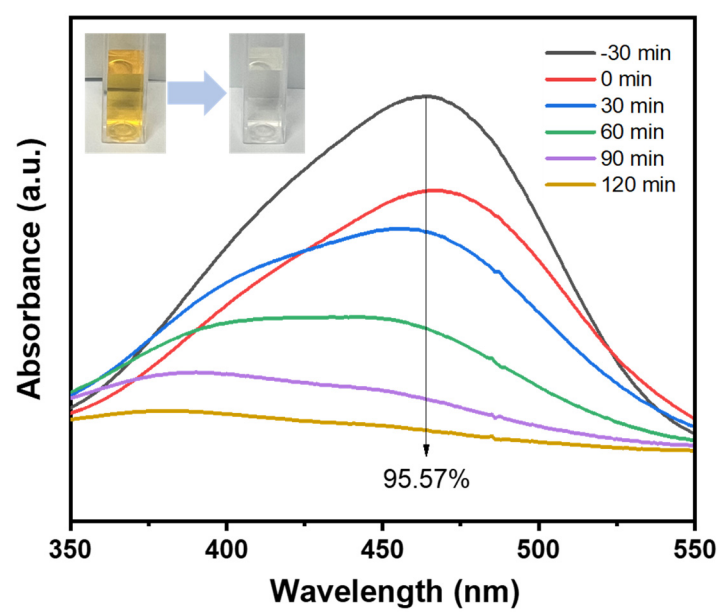

**Figure S3.** UV-absorbance of MO dye over  $\text{TiO}_2$  QDs@g- $\text{C}_3\text{N}_4$  under simulated solar light.

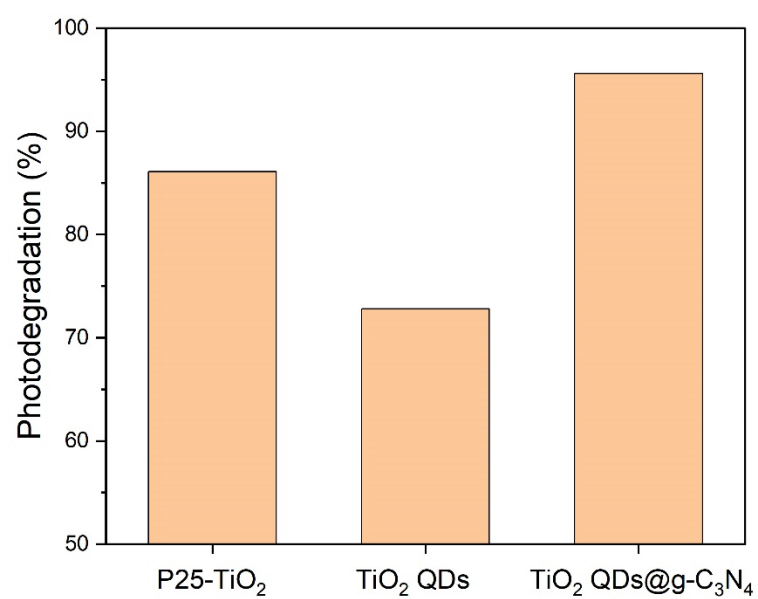

**Figure S4.** The comparison of photodegradation over as-prepared samples after 120 min irradiation.

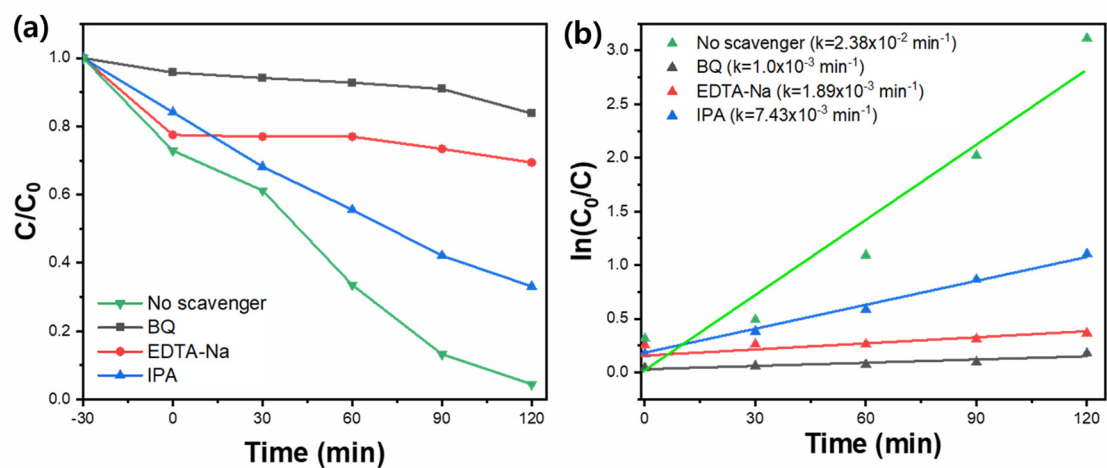

**Figure S5.** (a) Photodegradation rate of MO dye over the TiO<sub>2</sub> QDs@g-C<sub>3</sub>N<sub>4</sub> in the presence of scavengers, (b) Kinetic plot for the photodegradation of MO in (a).

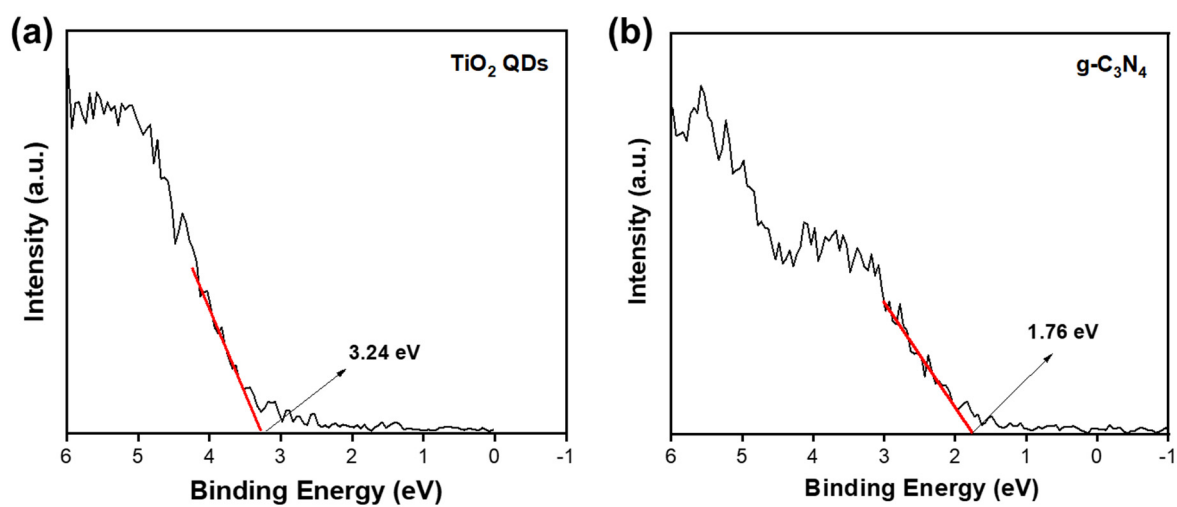

**Figure S6.** Low-energy XPS VB spectra of (a)  $\text{TiO}_2$  QDs, (b)  $\text{g-C}_3\text{N}_4$  samples.

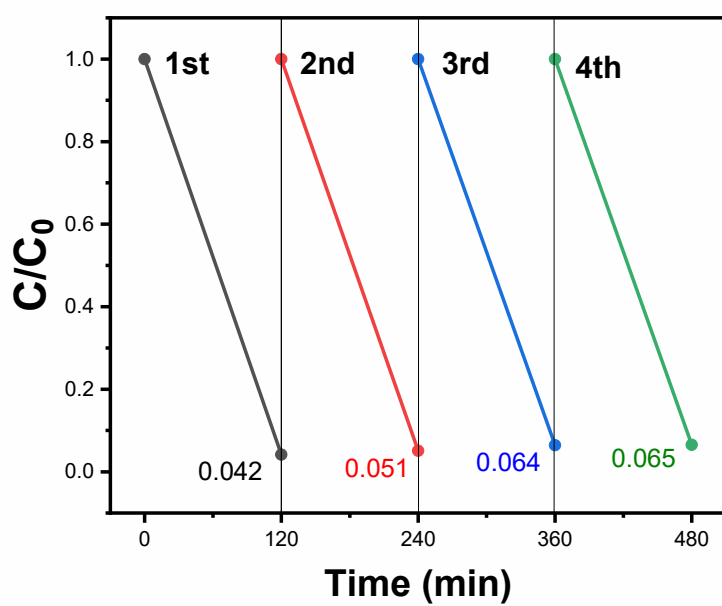

**Figure S7.** The degradation rate of MO dye after 120 min irradiation using the  $\text{TiO}_2$  QDs@g- $\text{C}_3\text{N}_4$  photocatalyst that was recycled four times.



**Table S1.** Elemental composition of TiO<sub>2</sub> QDs@g-C<sub>3</sub>N<sub>4</sub> by XPS analysis

| Elemental | TiO <sub>2</sub> QDs@g-C <sub>3</sub> N <sub>4</sub> |       |
|-----------|------------------------------------------------------|-------|
|           | at. %                                                | wt. % |
| C         | 41.55                                                | 26.39 |
| N         | 4.40                                                 | 3.26  |
| Ti        | 14.97                                                | 37.25 |
| O         | 39.08                                                | 33.10 |

**Table S2.** Elemental composition of g-C<sub>3</sub>N<sub>4</sub> by XPS analysis

| Elemental | g-C <sub>3</sub> N <sub>4</sub> |
|-----------|---------------------------------|
|           | at %                            |
| C         | 51.39                           |
| N         | 42.52                           |
| O         | 6.08                            |
